# Supplementary material for: Association of Clinical Features with Spike Glycoprotein Mutations in Iranian COVID-19 Patients
Source: MDPI journal article supplement (doi:10.3390/jcm11216315), 2022-10-26
Supplement: s1 [file s1]

# Supplementary Materials

**Table S1.** Nonsynonymous mutations identified in spike protein of SARS-CoV-2 isolated from COVID-19 patients in Isfahan, Iran compared with hCoV-19/Wuhan/WIV04/ 2019.

| Mutations | Total No.<br>(n = 60) | Wave 2 | Wave 3 | NCBI Accession ID of Submitted Sequence Where the Mutation is Detected                                                                                                                                                                                                                                                                                                                                                                                                                                                                           |
|-----------|-----------------------|--------|--------|--------------------------------------------------------------------------------------------------------------------------------------------------------------------------------------------------------------------------------------------------------------------------------------------------------------------------------------------------------------------------------------------------------------------------------------------------------------------------------------------------------------------------------------------------|
| D111N     | 8                     | 6      | 2      | MW132940.1(54), MW113237.1(61), MW113670.1 (62), MW114306.1 (63), MW132928.1 (65), MW114446.1 (69), MZ206020.1 (85), MZ206163.1 (91)                                                                                                                                                                                                                                                                                                                                                                                                             |
| Q115H     | 9                     | 7      | 2      | MW322566.1 (50), MW113237.1(61), MW113670.1 (62), MW114306.1 (63), MW114523.1(64), MW114305.1 (66), MZ203839.1 (71), MZ206020.1 (85), MZ206163.1 (91)                                                                                                                                                                                                                                                                                                                                                                                            |
| E224K     | 7                     | 5      | 0      | MW126756.1(22), MW320670.1 (25), MW321439.1(44), MW321481.1 (46), MW321483.1 (47), MW321496.1 (49), MW132896.1(56)                                                                                                                                                                                                                                                                                                                                                                                                                               |
| D228N     | 5                     | 5      | 0      | MW320670.1 (25), MW321439.1(44), MW321481.1 (46), MW321496.1 (49), MW132896.1(56)                                                                                                                                                                                                                                                                                                                                                                                                                                                                |
| D614G     | 31                    | 9      | 22     | MW126756.1 (22), MW320672.1 (28), MW321483.1 (47), MW321496.1 (49), MW113237.1 (61), MW132928.1 (65), MW114305.1 (66), MW113679.1 (68), MW114446.1 (69), MZ203839.1 (71), MZ203840.1 (72), MZ203841.1 (73), MZ203843.1 (75), MZ203857.1 (77), MZ203865.1 (81), MZ206017.1 (83), MZ206018.1 (84), MZ206020.1(85), MZ206021.1 (86), MZ206131.1 (87), MZ206132.1 (88), MZ206133.1 (89), MZ206163.1 (91), MZ206164.1 (92), MZ206168.1 (95), MZ206170.1 (96), MZ206169.1 (97), MZ882185.1 (102), MZ882187.1 (103), MZ882256.1 (104), MZ882258.1 (106) |
| Q675R     | 5                     | 5      | 0      | MW321436.1 (42), MW321481.1 (46), MW132940.1(54), MW113670.1 (62), MW114306.1 (63)                                                                                                                                                                                                                                                                                                                                                                                                                                                               |
| D820N     | 8                     | 8      | 0      | MW320670.1 (25), MW320673.1 (27), MW320672.1 (28), MW320721.1 (38), MW321439.1(44), MW321481.1 (46), MW321496.1 (49), MW132896.1(56)                                                                                                                                                                                                                                                                                                                                                                                                             |
| V826G     | 6                     | 6      | 0      | MW126756.1(22), MW320670.1 (25), MW320671.1 (26), MW320673.1 (27), MW321481.1 (46), MW321496.1 (49)                                                                                                                                                                                                                                                                                                                                                                                                                                              |
| D830N     | 7                     | 7      | 0      | MW320670.1 (25), MW320671.1 (26), MW320673.1 (27), MW321439.1(44), MW321496.1 (49), MW322566.1 (50), MW132896.1(56)                                                                                                                                                                                                                                                                                                                                                                                                                              |

**Table S2.** Association between patients' sex and COVID-19 symptoms in patients.

|                                    | Incidence rate | Female         | Male           | p Value          |
|------------------------------------|----------------|----------------|----------------|------------------|
| <b>Total Number of Case</b>        | 60             | 30% (18/60)    | 70% (42/60)    | <b>&lt;0.001</b> |
| <b>Fever</b>                       | 56.66% (34/60) | 50% (9/18)     | 59.52% (25/42) | NS               |
| <b>Cough</b>                       | 43.33% (26/60) | 38.88% (7/18)  | 45.23% (19/42) | NS               |
| <b>Muscular Pain</b>               | 65% (39/60)    | 72.22% (13/18) | 61.90% (26/42) | NS               |
| <b>Respiratory distress</b>        | 35% (21/60)    | 22.22% (4/18)  | 40.47% (17/42) | NS               |
| <b>Loss of consciousness</b>       | 10% (6/60)     | 5.55% (1/18)   | 11.90% (5/42)  | NS               |
| <b>Loss or less sense of Smell</b> | 41.83% (25/60) | 44.44% (8/18)  | 40.47% (17/42) | NS               |
| <b>Loss or less sense of taste</b> | 40% (24/60)    | 38.88% (7/18)  | 40.47% (17/42) | NS               |
| <b>Nausea</b>                      | 13.33% (8/60)  | 11.11% (2/18)  | 14.28% (6/42)  | NS               |
| <b>Vomiting</b>                    | 3.3% (2/60)    | 5.55% (1/18)   | 2.38% (1/42)   | NS               |
| <b>Diarrhea</b>                    | 13.33% (8/60)  | 16.66% (3/18)  | 11.90% (5/42)  | NS               |
| <b>Anorexia</b>                    | 40% (24/60)    | 38.88% (7/18)  | 40.47% (17/42) | NS               |
| <b>Headache</b>                    | 33.33% (20/60) | 38.88% (7/18)  | 30.95% (13/42) | NS               |
| <b>Dizziness</b>                   | 26.6% (16/60)  | 27.27% (5/18)  | 26.19% (11/42) | NS               |
| <b>Chest pain</b>                  | 16.66% (10/60) | 16.66% (3/18)  | 16.66% (7/42)  | NS               |

|                                    |                  |                     |                     |           |
|------------------------------------|------------------|---------------------|---------------------|-----------|
| <b>Inflammation or skin lesion</b> | <b>5% (3/60)</b> | <b>0.00% (0/18)</b> | <b>7.14% (3/42)</b> | <b>NS</b> |
|------------------------------------|------------------|---------------------|---------------------|-----------|

$p < 0.05$  = significant difference (bold); NS = Non-significant ( $p > 0.05$ );  $0.05 > p > 0.10$  = tendency.

**Table S3.** Association between age and COVID-19 symptoms in patients.

|                                    | <b>Incidence Rate</b> | <b>≤40 Year</b>       | <b>&gt;40 Year</b>    | <b>p Value</b>   |
|------------------------------------|-----------------------|-----------------------|-----------------------|------------------|
| <b>Total Number of Case</b>        | <b>60</b>             | <b>31.66% (19/60)</b> | <b>68.33% (41/60)</b> | <b>&lt;0.001</b> |
| <b>Fever</b>                       | <b>56.66% (34/60)</b> | <b>52.63% (10/19)</b> | <b>58.53% (24/41)</b> | <b>NS</b>        |
| <b>Cough</b>                       | <b>43.33% (26/60)</b> | <b>47.36% (9/19)</b>  | <b>41.46% (17/41)</b> | <b>NS</b>        |
| <b>Muscular Pain</b>               | <b>65% (39/60)</b>    | <b>78.94% (15/19)</b> | <b>82.92% (34/41)</b> | <b>NS</b>        |
| <b>Respiratory distress</b>        | <b>35% (21/60)</b>    | <b>47.36% (9/19)</b>  | <b>29.26% (12/41)</b> | <b>NS</b>        |
| <b>Loss of consciousness</b>       | <b>10% (6/60)</b>     | <b>10.52% (2/19)</b>  | <b>9.75% (4/41)</b>   | <b>NS</b>        |
| <b>Loss or less sense of Smell</b> | <b>41.83% (25/60)</b> | <b>68.42% (13/19)</b> | <b>29.26% (12/41)</b> | <b>0.006</b>     |
| <b>Loss or less sense of taste</b> | <b>40% (24/60)</b>    | <b>57.89% (11/19)</b> | <b>31.70% (13/41)</b> | <b>0.058</b>     |
| <b>Nausea</b>                      | <b>13.33% (8/60)</b>  | <b>15.78% (3/19)</b>  | <b>12.19% (5/41)</b>  | <b>NS</b>        |
| <b>Vomiting</b>                    | <b>3.3% (2/60)</b>    | <b>10.52% (2/19)</b>  | <b>0.00% (0/41)</b>   | <b>NS</b>        |
| <b>Diarrhea</b>                    | <b>13.33% (8/60)</b>  | <b>21.05% (4/19)</b>  | <b>9.75% (4/41)</b>   | <b>NS</b>        |
| <b>Anorexia</b>                    | <b>40% (24/60)</b>    | <b>47.36% (9/19)</b>  | <b>36.58% (15/41)</b> | <b>NS</b>        |
| <b>Headache</b>                    | <b>33.33% (20/60)</b> | <b>52.63% (10/19)</b> | <b>24.36% (10/41)</b> | <b>0.034</b>     |
| <b>Dizziness</b>                   | <b>26.6% (16/60)</b>  | <b>42.10% (8/19)</b>  | <b>19.51% (8/41)</b>  | <b>0.071</b>     |
| <b>Chest pain</b>                  | <b>16.66% (10/60)</b> | <b>31.54% (6/18)</b>  | <b>9.75% (4/41)</b>   | <b>0.044</b>     |
| <b>Inflammation or skin lesion</b> | <b>5% (3/60)</b>      | <b>5.26% (1/19)</b>   | <b>4.87% (2/41)</b>   | <b>NS</b>        |

$p < 0.05$  = significant difference (bold); NS = Non-significant ( $p > 0.05$ );  $0.05 > p > 0.10$  = tendency.
